# Supplementary material for: Absence of deformed wing virus and Varroa destructor in Australia provides unique perspectives on honeybee viral landscapes and colony losses
Source: PubMed Central journal article supplement (PMC5537221; doi:10.1038/s41598-017-07290-w), 2017-07-31
Supplement: 41598_2017_7290_MOESM1_ESM.pdf [file 41598_2017_7290_MOESM1_ESM.pdf]

1 **Absence of deformed wing virus and *Varroa destructor* in Australia**  
2 **provides unique perspectives on honeybee viral landscapes and colony**  
3 **losses**

4

5 John M K Roberts<sup>1\*</sup>, Denis L Anderson<sup>1,2</sup> and Peter A Durr<sup>3</sup>

6 <sup>1</sup>Commonwealth Scientific and Industrial Research Organisation, Canberra, ACT, 2601, Australia

7 <sup>2</sup>ADFCA, Research and Development Division, Al Ain, UAE

8 <sup>3</sup>CSIRO-Australian Animal Health Laboratory, Geelong, Victoria, 3219, Australia

9 \*Author for correspondence

10

11

12

13

14

15

16

17

18

19

20

21

22

23

24

25 **Supplementary material 1. Primers used for RT-PCR virus detection.  $T_a$  is the**  
 26 **PCR annealing temperature.**

| Virus           | Primers                                  | $T_a$ | Reference                             |
|-----------------|------------------------------------------|-------|---------------------------------------|
| IAPV            | F: AGACACCAATCACGGACCTCAC                | 58 °C | Maori et al 2007 <sup>1</sup>         |
|                 | R: AGATTTGTCTGTCTCCCAGTGACAT             |       |                                       |
| KBV             | F: GATGAACGTCGACTATTGA                   | 58 °C | Stoltz et al 1995 <sup>2</sup>        |
|                 | R: TGTGGGTTGGCTATGAGTCA                  |       |                                       |
| BQCV            | F: TGG TCA GCT CCC ACT ACC TAA AAC       | 58 °C | Benjeddou et al 2001 <sup>3</sup>     |
|                 | R: GCA ACA AGA AAC GTA AAC CAC           |       |                                       |
| LSV1            | F: TTA TCT CGC GCC GCC ACC TC            | 52 °C | Runckel et al 2011 <sup>4</sup>       |
|                 | R: ATC GCC GCT GCA ACG TGA CC            |       |                                       |
| LSV2            | F: CGG CCG GTC TAG CGT GGT TG            | 52 °C | Runckel et al 2011 <sup>4</sup>       |
|                 | R: TGG CAA GCT GTG ACG AAT CCC T         |       |                                       |
| DWV-A/<br>DWV-B | F: ATA TTC ACG GAT TGT TTG AAA GA        | 58 °C | Meeus et al 2010 <sup>5</sup>         |
|                 | R: CRC TAA CAT TCA TGA TAA GAT CGT C     |       |                                       |
| SBPV            | F: GAT TTG CGG AAT CGT AAT ATT GTT TG    | 58 °C | de Miranda 2010 <sup>6</sup>          |
|                 | R: ACC AGT TAG TAC ACT CCT GGT AAC TTC G |       |                                       |
| SBV             | F: AAT GGT GCG GTG GAC TAT GG            | 58 °C | Grabensteiner et al 2001 <sup>7</sup> |
|                 | R: TGA TAC AGA GCG GCT CGA CA            |       |                                       |
| ABPV            | F: TGA GAA CAC CTG TAA TGT GG            | 58 °C | Tentcheva et al 2004 <sup>8</sup>     |
|                 | R: ACC AGA GGG TTG ACT GTG TG            |       |                                       |
| CBPV            | F: AGT TGT CAT GGT TAA CAG GAT ACG AG    | 58 °C | Ribiere et al 2000 <sup>9</sup>       |
|                 | R: TCT AAT CTT AGC ACG AAA GCC GAG       |       |                                       |

27

28

29

30

31

32

33

34 **Supplementary material 2. Summary of BLAST results for sequence fragments from NT, QLD and WA-2 samples that mapped to**  
 35 **DWV reference genomes.**

| Sequence fragment and length | BLAST aligned sequence                                                                                                                                                                                                                                                                                                                                                                                                         | Location on aligned sequence | Highest nucleotide similarity to DWV isolates     |
|------------------------------|--------------------------------------------------------------------------------------------------------------------------------------------------------------------------------------------------------------------------------------------------------------------------------------------------------------------------------------------------------------------------------------------------------------------------------|------------------------------|---------------------------------------------------|
| NT DWV-like 1 (54bp)         | GTAGGGACCCCTCTATCCCTAGGTAAGTATGTCGCGAAAGTATGAAAAGTAAT                                                                                                                                                                                                                                                                                                                                                                          | 734-787                      | 91% similar to DWV isolate leuven-dwv1 (KX783225) |
| NT DWV-like 2 (127bp)        | ATATGCGATGTACCTAATACAATACCTTTCAAGGTGCATGCATATTGGCGTGGAGAAATGCAAGTTCGAATACAAGTTAACTCGAATAAGTCCAGGTTGGTCAATGCAAGCCACTTGGTACTATT                                                                                                                                                                                                                                                                                                  | 2045-2171                    | 84% similar to DWV isolate leuven-dwv1 (KX783225) |
| NT DWV-like 3 (66bp)         | TGTTTATGTATGTGCAAGTACCATTGATACCGATGGAAGCTGTAGCTGATACTATCGATATTAATG                                                                                                                                                                                                                                                                                                                                                             | 3189-3254                    | 92% similar to DWV isolate leuven-dwv1 (KX783225) |
| NT DWV-like 4 (148bp)        | TGAAATGATGAATACTGTATCACCATCGTAAAACGATTGTTAGGCAAATATAGATTGGCGACGCAACCCAGGACCCAGCCGATTACGTAAGCTACCCCA GAGGGACCTAGTCTGAGGCTGAGGAAACAAGTCGCTGG                                                                                                                                                                                                                                                                                     | 4867-5017                    | 75% similar to DWV isolate leuven-dwv1 (KX783225) |
| NT DWV-like 5 (51bp)         | GTGAAGATGAACCTGAAATTGTAAGCGATGGGTTAAGAATGTTTGATT                                                                                                                                                                                                                                                                                                                                                                               | 5240-5291                    | 89% similar to DWV isolate leuven-dwv1 (KX783225) |
| NT DWV-like 6 (421bp)        | ATTTTGTGCATGACCTTACAGCTGAGATGAATCAGTCGAGAAATTTGACTGTGTTTACTCGGGTGTATGATCAAATATCGAAATGAAGACCGACCTGAATGTTTTAC GATTTGTATGACTGGTCTCCTGGTATTGGTAAGTCATTCTTAACTGATGCAAGTAGTACTCCGTAACACGGGCATCAAGTGTGTCGTTAATCCCTTATCAGATTATT GGGATCAGTGTGACTTTCAACCAGTCTTGTGCGTAGACGACATGTGGAGTGTGAGACTGGAGCAACTTTGGACAAACAACTAAATTTGCTCTTCAGGTTCACTCTCC AATTGTCCTAAAGCTGATTAGATGGTAAGAAGATGAGGTATAATCCTGAAATCTTCATTTATAATACCAATAAACCTTTCCGGTATTGAT | 5375-5863                    | 72% similar to DWV isolate leuven-dwv1 (KX783225) |
| NT DWV-like 7 (95bp)         | TTTGATAATCCTACGTGGCGATTAATATATAATGCATCAAGAAAGGGTTGCCAGAATATTATACACTACCAAGTATGAAATTTTCATTAGATTC                                                                                                                                                                                                                                                                                                                                 | 7049-7143                    | 78% similar to DWV isolate leuven-dwv1 (KX783225) |
| NT DWV-like 8 (203bp)        | CACTTGAAGAGAAAGTTTATAACCGTTATTAACCTATAAACGGTTGAAAATTCGTAGTCTGAGGATGCTATTTTGGCGCACCTGGAGTAGAAGGATATGATTCGA TTTCTGGAAATACGAGTGCCGTTTTCCGTTGTCTACAATGAAGCCGGCTGGAACATCAGGAAAGCGCTGGTTGTTTGATATTGAACCTACAAG                                                                                                                                                                                                                        | 8480-8681                    | 77% similar to DWV isolate leuven-dwv1 (KX783225) |
| NT DWV-like 9 (153bp)        | GGGCATAAAGCCACATACGATATTTACTGACTGCCTCAAAGATACATGTTGCCCATAGAGAAGTGTATGATACCGGGTAAAACGAGGATATTTAGTATTGCGCCTGTT CAATATACAATACCTTTTCGACAATATTTCTCGATTATGCGC                                                                                                                                                                                                                                                                        | 8761-8913                    | 77% similar to DWV isolate leuven-dwv1 (KX783225) |
| NT DWV-like 10               | ATTATACAGAGGAAAAAGATAAAGACTGAGATGAGTCGAGTCATGTGGACTATGGCTCAGGAGATCTTGCAACCAAGCCATCTTTGTAGAGATTGGTGTATAGAGTAC                                                                                                                                                                                                                                                                                                                   | 9111-9253                    | 75% similar to DWV isolate leuven-dwv1 (KX783225) |

|                           |                                                                                                                                                                                                                                                                                                                                     |            |                                                   |
|---------------------------|-------------------------------------------------------------------------------------------------------------------------------------------------------------------------------------------------------------------------------------------------------------------------------------------------------------------------------------|------------|---------------------------------------------------|
| (143bp)                   | CTTGTGGCATACTTCGGGCTCACCCATCACGGAC                                                                                                                                                                                                                                                                                                  |            |                                                   |
| NT DWV-like 11<br>(72bp)  | CGTGTAGCCACTATAGAAAATGCTAAACAATCTCTAGAGTTGGCATTGCGTTGGGGTCCGCAACTTCAAT                                                                                                                                                                                                                                                              | 9626-9697  | 83% similar to DWV isolate leuven-dwv1 (KX783225) |
| NT DWV-like 12<br>(44bp)  | AAGCTTGGTATTTATGAGGATCTCATTACATGGGAGGAGATGGA                                                                                                                                                                                                                                                                                        | 9731-9774  | 89% similar to DWV isolate leuven-dwv1 (KX783225) |
| QLD DWV-like 1<br>(105bp) | TAGACCTCTACGGCATCGAGTAGAGATTAAGAGTAGTGAATAGTATAATCACTGTCTACCACCACATATGGTAATGATATGGTTGTGTAACCGGTTAT                                                                                                                                                                                                                                  | 488-592    | 80% similar to VDV-1 genome (AY251269)            |
| QLD DWV-like 2<br>(99bp)  | ATGTCAGGTTATATTGAATGCTCGAGTATGATTTCTGCGTTGGAGTCGGGACCCCTCGGTCTCCAGGTGTCGCATGTGACGAAAGTGCAGAAAATA                                                                                                                                                                                                                                    | 687-785    | 80% similar to VDV-1 genome (AY251269)            |
| QLD DWV-like 3<br>(135bp) | ATATGCGATGTACCTAATACAATACCATTCAAGGTACATGCATATTGGCGTGGAGAGATGCAAGTTCGAATACAAGTTAATCGAATAAATCCAAGTAGGTC AATTGC<br>AAGCCACTTGGTATTATATGGATTAT                                                                                                                                                                                          | 2045-2179  | 84% similar to VDV-1 genome (AY251269)            |
| QLD DWV-like 4<br>(232bp) | ATGGATTATGACACTTAAAGCATCAAGTTATGTTGATTGTTGCAAGAAACAATAGCTTTACGTTGAAGTGCCTTATGTGCATATAGACCATGGTGGTGT<br>ATGTATGTACAAGTACCGTTGATACCTATGGAAGCTGTTGCAGATACCATAGATATCAATGTGTATTTAAGAGGAGGCTCTTCATTTGAAGTATGTATTCTGTACAACC<br>TAGTGTAGGATT                                                                                                | 3029-3315  | 69% similar to VDV-1 genome (AY251269)            |
| QLD DWV-like 5<br>(326bp) | TTTCCGCAACACCAGAAGGACCTAGTGCTGAGGCTGAGGAAACAAGTGCCTGGGTATCCGTTATTTATAACGGTGTGGTGAATATGTTGAATGTGGTGGCACAAAAGC<br>CAAAACAATTTAAAGACTGGGTAAAATGTTTCCCAAGATTTGGAAACAATGTAGAAGTAGTAATCAGGTATTATATCTTTAAGAACACCTTTGAGGTTTTGAA<br>GAATTTGTAGGACTAATCCTGCCCTCGCCTATTGAAGGCTGTGAGCGATGAGCCCGAGATACTCAAAGCGTGGTTAAGAATGTTGTACTTAAATGATCCCAAAT | 4965-5307  | 77% similar to VDV-1 genome (AY251269)            |
| QLD DWV-like 6<br>(111bp) | TACACCTGTCAACCTGGAATTAAGTGTGTTGTAATCCCTCTCTGACTATTGGGATCAGTGTGATTCCAACCGGTTTTGTGCGTTGATGATATGGGAGTGTGGAAA<br>C                                                                                                                                                                                                                      | 5599-5709  | 82% similar to VDV-1 genome (AY251269)            |
| QLD DWV-like 7<br>(98bp)  | AACTATTTAGTATTTATCCATAAATCATGGTTATACGCAAATCCACGTGGAGACTGATTTTAAATGGTTCAAAGAAAGGTATGCCAGAGTATTT                                                                                                                                                                                                                                      | 7013-7110  | 80% similar to VDV-1 genome (AY251269)            |
| QLD DWV-like 8<br>(90bp)  | TGGAATACGAGTGCAGGTTTTCCATTGTCAACAATGAAACCTGCTGGAACATCTGGAAGAGATGGTGTGATATTGAACTAAAAGAT                                                                                                                                                                                                                                              | 8594-8683  | 80% similar to VDV-1 genome (AY251269)            |
| QLD DWV-like 9<br>(88bp)  | CAACGACTCAAGAAATGAGAAAGAGAGGAATCAAGCCTCACACCATCTCACAGATTGCCTCAAAGATACATGTTGCCAGTAGAAAA                                                                                                                                                                                                                                              | 8736-8823  | 82% similar to VDV-1 genome (AY251269)            |
| QLD DWV-like 10           | AGGGAAGTACCACCCCTCGTTGTTTTAAATCTGCTAATAGGAATGAACCTATTATAAGAGTCCAAAAGCAGTGTGATTAGACCATCACTTTGGCTTATAC                                                                                                                                                                                                                                | 9854-10050 | 85% similar to VDV-1 genome (AY251269)            |

|                            |                                                                                                                                    |           |                                                    |
|----------------------------|------------------------------------------------------------------------------------------------------------------------------------|-----------|----------------------------------------------------|
| (198bp)                    | TAGAGAAAGGATGAGTGCCTCTAAAGGCTCAATCCGTAGTAGAGTAGGTTTAATTAGGATTAAGTGGTACTCTAGGTTAGGTATT                                              |           |                                                    |
| WA-2 DWV-like 1<br>(127bp) | ATAGGTAATGATCCCAATACGGTACCATTAGAGTACATGCATATTGGCGTGGAGATATTGAAGTTAAAAATTCAGATAAATCTAATAAATTTCAAGTTGGGCAATTGC<br>AAGCTACTTGGTATTATT | 2072-2198 | 84% similar to DWV isolate Chilensis A1 (JQ413340) |
| WA-2 DWV-like 2<br>(91bp)  | TGGCGTGGATCTTTGGAGTATCGATTTGATATCGTTGCTTCTCAATTCATACTGGTAGGTTGATTGTAGGCTATATCCCCGGATATGACA                                         | 2948-3037 | 80% similar to DWV isolate Chilensis A1 (JQ413340) |
| WA-2 DWV-like 3<br>(98bp)  | AATTGTCAAAGTAGTAATCAAGTATTTATTTTCTTTAAGAATACATTTGAAGTATTAAGAAGACTTGGGCTATTTATTTTGTCAAGTAATCCTGC                                    | 5150-5247 | 81% similar to DWV isolate Chilensis A1 (JQ413340) |

36 **Supplementary material 3. Alignment of mapped reads from the NT sample to DWV-A (NC\_004830), DWV-B (NC\_006494) and**  
37 **DWV-C (ERS657949) using Geneious (Version 9.1.5, created by Biomatters, Auckland, New Zealand)**

38

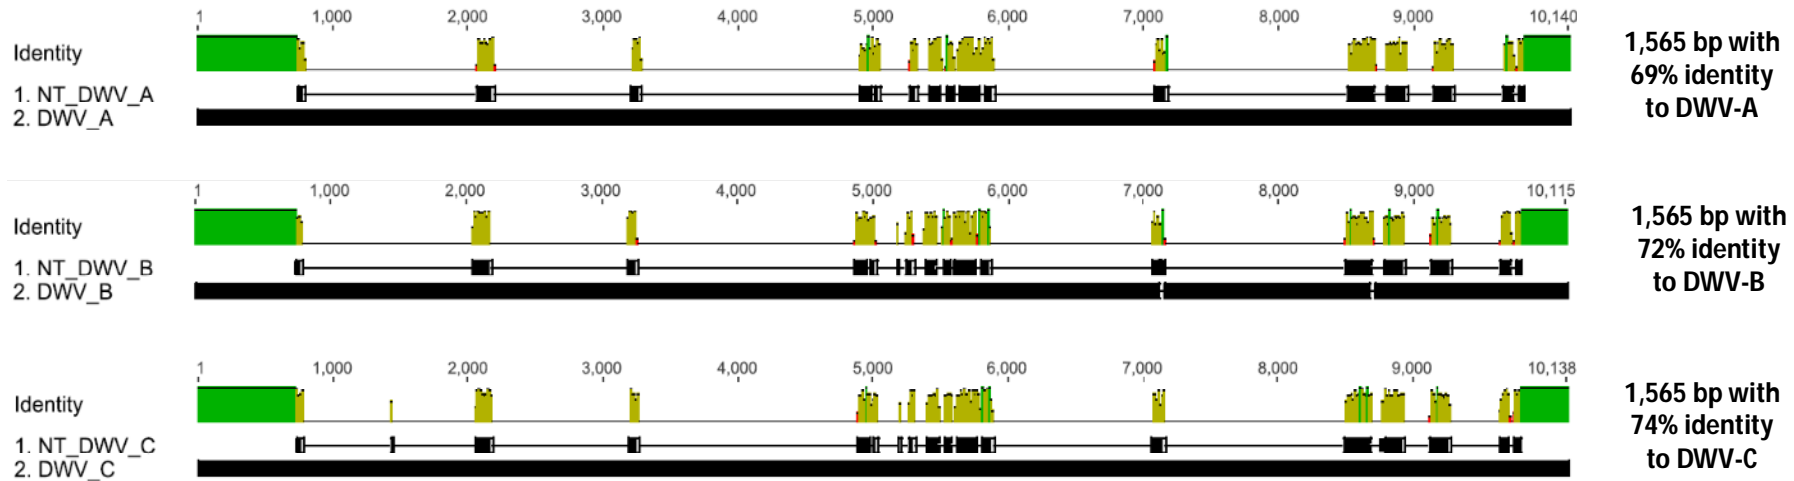

39

40

41

42

43

44

45

46 **Supplementary material 4. Australian apiary survey results within the context of comparable molecular-based surveys. In relation**  
 47 **to Figure 4, populations with profiles 1-3 are on the lower end of the stress spectrum, populations with profile 4 range across the**  
 48 **middle of the stress spectrum and populations with profile 5 are on the high end of the stress spectrum.**

49

| Survey reference             | Country:<br>Region           | Increased colony losses recorded | Colony stressors         |             |                                             |                                                           |                 |                   | Stress profile | Commercial-scale beekeepers |
|------------------------------|------------------------------|----------------------------------|--------------------------|-------------|---------------------------------------------|-----------------------------------------------------------|-----------------|-------------------|----------------|-----------------------------|
|                              |                              |                                  | <i>Varroa destructor</i> | DWV complex | Other viruses detected                      | Viruses tested for but <u>not</u> detected                | Other pathogens | Abiotic stressors |                |                             |
| This survey                  | Australia                    | No                               | No                       | No          | BQCV<br>SBV<br>LSV1<br>LSV2<br>IAPV<br>ALPV | DWV<br>SBPV<br>KBV<br>CBPV<br>ABPV                        | Most            | Most              | 1              | Yes                         |
| Malfroy et al. <sup>10</sup> | Australia:<br>Norfolk Island | No                               | No                       | No          | LSV                                         | DWV<br>ABPV<br>IAPV<br>KBV<br>BQCV<br>SBV<br>CBPV<br>SBPV | Few             | Few               | 2              | No                          |

|                                              |                                     |    |     |       |                                     |                                      |      |      |   |     |
|----------------------------------------------|-------------------------------------|----|-----|-------|-------------------------------------|--------------------------------------|------|------|---|-----|
| Kajobe et al. <sup>11</sup>                  | Uganda                              | No | No  | No    | BQCV                                | DWV<br>SBV<br>CBPV<br>ABPV<br>IAPV   | Few  | Few  | 2 | No  |
| Shutler et al. <sup>12</sup>                 | Canada :<br>Newfoundland            | No | No  | DWV-A | BQCV                                | IAPV<br>KBV<br>SBV                   | Few  | Few  | 3 | No  |
| Sanpa and<br>Chantawannakul<br><sup>13</sup> | Thailand :<br>Northern<br>provinces | No | Yes | DWV-A | ABPV<br>KBV<br>SBV                  | BQCV<br>CBPV                         | Most | Some | 4 | Yes |
| Ai et al. <sup>14</sup>                      | China                               | No | Yes | DWV-A | ABPV<br>IAPV<br>BQCV<br>SBV<br>CBPV | KBV                                  | Most | Most | 4 | Yes |
| Kojima et al. <sup>15</sup>                  | Japan                               | No | Yes | DWV-A | BQCV<br>SBV<br>IAPV                 | CBPV<br>KBV<br>ABPV                  | Most | Most | 4 | Yes |
| Strauss et al. <sup>16</sup>                 | South Africa                        | No | Yes | DWV-B | BQCV<br>IAPV                        | DWV-A<br>SBV<br>CBPV<br>KBV<br>VdMLV | Most | Some | 4 | Yes |
| Muli et al. <sup>17</sup>                    | Kenya                               | No | Yes | DWV-A | BQCV<br>ABPV                        | SBV<br>KBV<br>IAPV                   | Some | Some | 4 | No  |



|                                |                                  |    |     |       |                                     |                             |      |      |   |     |
|--------------------------------|----------------------------------|----|-----|-------|-------------------------------------|-----------------------------|------|------|---|-----|
|                                |                                  |    |     |       |                                     | CBPV                        |      |      |   |     |
| Yang et al. <sup>18</sup>      | China                            | No | Yes | DWV-A | BQCV<br>IAPV<br>SBV<br>CBPV         | ABPV<br>KBV                 | Most | Most | 4 | Yes |
| Mondet et al. <sup>19</sup>    | New Zealand                      | No | Yes | DWV-A | BQCV<br>KBV<br>SBV<br>CBPV          |                             | Some | Most | 4 | Yes |
| Adjlane et al. <sup>20</sup>   | Algeria                          | No | Yes | DWV-A | BQCV<br>SBV<br>ABPV<br>IAPV<br>CBPV | DWV-B                       | Most | Some | 4 | No  |
| Tsevegmid et al. <sup>21</sup> | Mongolia:<br>northern<br>regions | No | Yes | DWV-A | SBV<br>BQCV<br>CBPV                 | ABPV<br>KBV<br>IAPV<br>LSV2 | Some | Some | 4 | No  |
| Giacobino et al. <sup>22</sup> | Argentina                        | No | Yes | DWV-A | BQCV<br>ABPV<br>CBPV                | KBV<br>IAPV                 | Most | Some | 4 | Yes |
| Anido et al. <sup>23</sup>     | Uruguay                          | No | Yes | DWV-A | BQCV<br>SBV<br>ABPV                 | IAPV<br>KBV                 | Most | Some | 4 | Yes |
| Teixeira et al. <sup>24</sup>  | Brazil:<br>southeast             | No | Yes | DWV-A | BQCV<br>ABPV                        | KBV<br>CBPV                 | Most | Some | 4 | Yes |

|                                | region               |     |     |                |                                            | SBV         |      |      |   |     |
|--------------------------------|----------------------|-----|-----|----------------|--------------------------------------------|-------------|------|------|---|-----|
| Soroker et al. <sup>25</sup>   | Israel               | No  | Yes | DWV-A<br>DWV-B | BQCV<br>SBV<br>ABPV<br>IAPV                | KBV<br>CBPV | Most | Most | 4 | Yes |
| Rodriguez et al. <sup>26</sup> | Chile: Biobio region | No  | Yes | DWV-A          | BQCV<br>SBV<br>ABPV                        |             | Most | Some | 4 | Yes |
| Desai et al. <sup>27</sup>     | Canada               | Yes | Yes | DWV-A          | BQCV<br>SBV<br>ABPV<br>KBV<br>IAPV<br>CBPV |             | Most | Most | 5 | Yes |
| Forgach et al. <sup>28</sup>   | Hungary              | Yes | Yes | DWV-A          | BQCV<br>SBV<br>ABPV                        | KBV<br>CBPV | Most | Most | 5 | Yes |
| Tentcheva et al. <sup>8</sup>  | France               | Yes | Yes | DWV-A          | BQCV<br>SBV<br>ABPV<br>KBV<br>CBPV         |             | Most | Most | 5 | Yes |
| Berenyi et al. <sup>29</sup>   | Austria              | Yes | Yes | DWV-A          | BQCV<br>SBV<br>ABPV<br>CBPV                | KBV         | Most | Most | 5 | Yes |

|                                   |                   |     |     |       |                                                    |             |      |      |   |     |
|-----------------------------------|-------------------|-----|-----|-------|----------------------------------------------------|-------------|------|------|---|-----|
| Genersch et al. <sup>30</sup>     | Germany           | Yes | Yes | DWV-A | SBV<br>ABPV<br>KBV                                 | IAPV        | Most | Most | 5 | Yes |
| Berthoud et al. <sup>31</sup>     | Switzerland       | Yes | Yes | DWV-A | ABPV                                               | KBV<br>CBPV | Most | Most | 5 | Yes |
| Nguyen et al. <sup>32</sup>       | Belgium           | Yes | Yes | DWV-A | BQCV<br>SBV<br>ABPV<br>CBPV                        |             | Most | Most | 5 | Yes |
| Baker and Schroeder <sup>33</sup> | England:<br>Devon | Yes | Yes | DWV-A | SBV<br>BQCV<br>ABPV                                | KBV<br>CBPV | Most | Most | 5 | Yes |
| Antunez et al. <sup>34</sup>      | Spain             | Yes | Yes | DWV-A | BQCV<br>SBV<br>IAPV<br>KBV                         |             | Most | Most | 5 | Yes |
| Cornman et al. <sup>35</sup>      | USA               | Yes | Yes | DWV-A | BQCV<br>SBV<br>LSV1<br>LSV2<br>ABPV<br>IAPV<br>KBV |             | Most | Most | 5 | Yes |
| Cox-Foster et al. <sup>36</sup>   | USA               | Yes | Yes | DWV-A | CBPV<br>SBV<br>BQCV<br>ABPV                        |             | Most | Most | 5 | Yes |

|                                      |                       |     |     |       |                                            |                             |      |      |   |     |
|--------------------------------------|-----------------------|-----|-----|-------|--------------------------------------------|-----------------------------|------|------|---|-----|
|                                      |                       |     |     |       | KBV<br>IAPV                                |                             |      |      |   |     |
| Dainat et al. <sup>37</sup>          | Switzerland           | Yes | Yes | DWV-A | BQCV<br>SBV<br>SBPV<br>ABPV                | IAPV<br>KBV<br>CBPV         | Most | Most | 5 | Yes |
| Budge et al. <sup>38</sup>           | England and<br>Wales  | Yes | Yes | DWV-A | BQCV<br>CBPV<br>SBV ABPV<br>KBV            |                             | Most | Most | 5 | Yes |
| Welch et al. <sup>39</sup>           | USA:<br>Massachusetts | Yes | Yes | DWV-A | BQCV<br>SBV                                | ABPV<br>KBV<br>IAPV<br>CBPV | Most | Most | 5 | Yes |
| Bacandritsos et al.<br><sub>40</sub> | Greece                | Yes | Yes | DWV-A | CBPV<br>BQCV<br>SBV<br>ABPV                |                             | Most | Most | 5 | Yes |
| Runckel et al. <sup>4</sup>          | USA                   | Yes | Yes | DWV-A | BQCV<br>CBPV<br>SBV<br>ABPV<br>KBV<br>IAPV |                             | Most | Most | 5 | Yes |
| Traynor et al. <sup>41</sup>         | USA                   | Yes | Yes | DWV-A | BQCV<br>SBV<br>CBPV                        | SBPV                        | Most | Most | 5 | Yes |

|                               |                |     |     |                |                                                  |                     |      |      |   |     |
|-------------------------------|----------------|-----|-----|----------------|--------------------------------------------------|---------------------|------|------|---|-----|
|                               |                |     |     |                | LSV2<br>ABPV<br>IAPV<br>KBV                      |                     |      |      |   |     |
| Tozkar et al. <sup>42</sup>   | Turkey         | Yes | Yes | DWV-A<br>DWV-B | BQCV<br>LSV<br>CBPV<br>ABPV<br>KBV<br>IAPV       | SBV<br>SBPV         | Most | Some | 5 | Yes |
| Ravoet et al. <sup>43</sup>   | Belgium        | Yes | Yes | DWV-A          | BQCV<br>SBV CBPV<br>LSV<br>ABPV<br>VdMLV<br>ALPV | IAPV<br>SBPV        | Most | Most | 5 | Yes |
| Amiri et al. <sup>44</sup>    | Denmark        | Yes | Yes | DWV-A          | SBV<br>BQCV<br>CBPV<br>ABPV<br>KBV               |                     | Most | Most | 5 | Yes |
| Gajger et al. <sup>45</sup>   | Croatia        | Yes | Yes | DWV-A          | BQCV<br>SBV<br>ABPV<br>CBPV                      | KBV<br>IAPV         | Most | Most | 5 | Yes |
| Granberg et al. <sup>46</sup> | Spain: Navarre | Yes | Yes | No             | IAPV<br>ALPV                                     | BQCV<br>SBV<br>ABPV | Most | Most | 5 | Yes |

|                              |         |     |     |       |                                    |            |      |      |   |     |
|------------------------------|---------|-----|-----|-------|------------------------------------|------------|------|------|---|-----|
|                              |         |     |     |       | LSV                                | KBV<br>DWV |      |      |   |     |
| Nielsen et al. <sup>47</sup> | Denmark | Yes | Yes | DWV-A | BQCV<br>CBPV<br>SBV<br>ABPV<br>KBV |            | Most | Most | 5 | Yes |

50

51

52 **Supplementary material references**

- 53 1 Maori, E. *et al.* Isolation and characterization of Israeli acute paralysis virus, a dicistrovirus affecting honeybees in Israel: evidence for diversity due  
54 to intra- and inter-species recombination. *Journal of General Virology* **88**, 3428-3438, doi:10.1099/vir.0.83284-0 (2007).
- 55 2 Stoltz, D., Shen, X. R., Boggis, C. & Sisson, G. Molecular diagnosis of Kashmir bee virus infection. *Journal of Apicultural Research* **34**, 153-160 (1995).
- 56 3 Benjeddou, M., Leat, N., Allsopp, M. & Davison, S. Detection of acute bee paralysis virus and black queen cell virus from honeybees by reverse  
57 transcriptase PCR. *Applied and Environmental Microbiology* **67**, 2384-2387, doi:10.1128/aem.67.5.2384-2387.2001 (2001).
- 58 4 Runckel, C. *et al.* Temporal analysis of the honey bee microbiome reveals four novel viruses and seasonal prevalence of known viruses, *Nosema* and  
59 *Crithidia*. *PLOS One* **6**, e20656 (2011).
- 60 5 Meeus, I., Smaghe, G., Siede, R., Jans, K. & de Graaf, D. C. Multiplex RT-PCR with broad-range primers and an exogenous internal amplification  
61 control for the detection of honeybee viruses in bumblebees. *Journal of Invertebrate Pathology* **105**, 200-203 (2010).
- 62 6 de Miranda, J. R. *et al.* Genetic characterization of slow bee paralysis virus of the honeybee (*Apis mellifera* L.). *Journal of General Virology* **91**, 2524-  
63 2530, doi:10.1099/vir.0.022434-0 (2010).
- 64 7 Grabensteiner, E. *et al.* Sacbrood virus of the honeybee (*Apis mellifera*): Rapid identification and phylogenetic analysis using reverse transcription-  
65 PCR. *Clinical and Diagnostic Laboratory Immunology* **8**, 93-104 (2001).
- 66 8 Tentcheva, D. *et al.* Prevalence and seasonal variations of six bee viruses in *Apis mellifera* L. and *Varroa destructor* mite populations in France.  
67 *Applied and Environmental Microbiology* **70**, 7185-7191, doi:10.1128/aem.70.12.7185-7191.2004 (2004).
- 68 9 Ribiere, M., Faucon, J. P. & Pepin, M. Detection of chronic honey bee (*Apis mellifera* L.) paralysis virus infection: application to a field survey.  
69 *Apidologie* **31**, 567-577, doi:10.1051/apido:2000147 (2000).

- 70 10 Malfroy, S. F., Roberts, J. M. K., Perrone, S., Maynard, G. & Nadine, C. A pest and disease survey of the isolated Norfolk Island honey bee (*Apis*  
71 *mellifera*) population. *Journal of Apicultural Research*,  
72 doi:10.1080/00218839.2016.1189676 (2016).
- 73 11 Kajobe, R. *et al.* First molecular detection of a viral pathogen in Ugandan honey bees. *Journal of Invertebrate Pathology* **104**, 153-156,  
74 doi:10.1016/j.jip.2010.02.007 (2010).
- 75 12 Shutler, D. *et al.* Honey Bee *Apis mellifera* Parasites in the Absence of *Nosema ceranae* Fungi and *Varroa destructor* Mites. *Plos One* **9**,  
76 doi:10.1371/journal.pone.0098599 (2014).
- 77 13 Sanpa, S. & Chantawannakul, P. Survey of six bee viruses using RT-PCR in Northern Thailand. *Journal of Invertebrate Pathology* **100**, 116-119,  
78 doi:10.1016/j.jip.2008.11.010 (2009).
- 79 14 Ai, H. X., Yan, X. & Han, R. C. Occurrence and prevalence of seven bee viruses in *Apis mellifera* and *Apis cerana* apiaries in China. *Journal of*  
80 *Invertebrate Pathology* **109**, 160-164, doi:10.1016/j.jip.2011.10.006 (2012).
- 81 15 Kojima, Y. *et al.* Infestation of Japanese Native Honey Bees by Tracheal Mite and Virus from Non-native European Honey Bees in Japan. *Microbial*  
82 *Ecology* **62**, 895-906, doi:10.1007/s00248-011-9947-z (2011).
- 83 16 Strauss, U. *et al.* Seasonal prevalence of pathogens and parasites in the savannah honeybee (*Apis mellifera* *scutellata*). *Journal of Invertebrate*  
84 *Pathology* **114**, 45-52, doi:10.1016/j.jip.2013.05.003 (2013).
- 85 17 Muli, E. *et al.* Evaluation of the Distribution and Impacts of Parasites, Pathogens, and Pesticides on Honey Bee (*Apis mellifera*) Populations in East  
86 Africa. *Plos One* **9**, doi:10.1371/journal.pone.0094459 (2014).
- 87 18 Yang, B., Peng, G., Li, T. & Kadowaki, T. Molecular and phylogenetic characterization of honey bee viruses, *Nosema* microsporidia, protozoan  
88 parasites, and parasitic mites in China. *Ecology and Evolution* **3**, 298-311, doi:10.1002/ece3.464 (2013).
- 89 19 Mondet, F., de Miranda, J. R., Kretzschmar, A., Le Conte, Y. & Mercer, A. R. On the Front Line: Quantitative Virus Dynamics in Honeybee (*Apis*  
90 *mellifera* L.) Colonies along a New Expansion Front of the Parasite *Varroa destructor*. *Plos Pathogens* **10**, doi:10.1371/journal.ppat.1004323 (2014).
- 91 20 Adjlane, N., Dainat, B., Gauthier, L. & Dietemann, V. Atypical viral and parasitic pattern in Algerian honey bee subspecies *Apis mellifera* *intermissa*  
92 and *A-m. sahariensis*. *Apidologie* **47**, 631-641, doi:10.1007/s13592-015-0410-x (2016).
- 93 21 Tsevegmid, K., Neumann, P. & Yanez, O. The Honey Bee Pathosphere of Mongolia: European Viruses in Central Asia. *Plos One* **11**,  
94 doi:10.1371/journal.pone.0151164 (2016).
- 95 22 Giacobino, A. *et al.* *Varroa destructor* and viruses association in honey bee colonies under different climatic conditions. *Environmental Microbiology*  
96 *Reports* **8**, 407-412, doi:10.1111/1758-2229.12410 (2016).
- 97 23 Anido, M. *et al.* Prevalence and distribution of honey bee pests and pathogens in Uruguay. *Journal of Apicultural Research* **54**, 532-540,  
98 doi:10.1080/00218839.2016.1175731 (2015).
- 99 24 Teixeira, E. W., Chen, Y. P., Message, D., Pettis, J. & Evans, J. D. Virus infections in Brazilian honey bees. *Journal of Invertebrate Pathology* **99**, 117-  
100 119, doi:10.1016/j.jip.2008.03.014 (2008).
- 101 25 Soroker, V. *et al.* Evaluation of colony losses in Israel in relation to the incidence of pathogens and pests. *Apidologie* **42**, 192-199,  
102 doi:10.1051/apido/2010047 (2011).

103 26 Rodriguez, M. *et al.* Prevalence and phylogenetic analysis of honey bee viruses in the Biobio Region of Chile and their association with other honey  
104 bee pathogens. *Chilean Journal of Agricultural Research* **74**, 170-177, doi:10.4067/s0718-58392014000200007 (2014).

105 27 Desai, S. D., Kumar, S. & Currie, R. W. Occurrence, detection, and quantification of economically important viruses in healthy and unhealthy honey  
106 bee (Hymenoptera: Apidae) colonies in Canada. *Canadian Entomologist* **148**, 22-35, doi:10.4039/tce.2015.23 (2016).

107 28 Forgach, P., Bakonyi, T., Tapasztai, Z., Nowotny, N. & Rusvai, M. Prevalence of pathogenic bee viruses in Hungarian apiaries: Situation before joining  
108 the European Union. *Journal of Invertebrate Pathology* **98**, 235-238, doi:10.1016/j.jip.2007.11.002 (2008).

109 29 Berenyi, O., Bakonyi, T., Derakhshifar, I., Koglbberger, H. & Nowotny, N. Occurrence of six honeybee viruses in diseased Austrian apiaries. *Applied  
110 and Environmental Microbiology* **72**, 2414-2420, doi:10.1128/aem.72.4.2414-2420.2006 (2006).

111 30 Genersch, E. *et al.* The German bee monitoring project: a long term study to understand periodically high winter losses of honey bee colonies.  
112 *Apidologie* **41**, 332-352, doi:10.1051/apido/2010014 (2010).

113 31 Berthoud, H., Imdorf, A., Haueter, M., Radloff, S. & Neumann, P. Virus infections and winter losses of honey bee colonies (*Apis mellifera*). *Journal of  
114 Apicultural Research* **49**, 60-65, doi:10.3896/ibra.1.49.1.08 (2010).

115 32 Nguyen, B. K. *et al.* Effects of honey bee virus prevalence, Varroa destructor load and queen condition on honey bee colony survival over the winter  
116 in Belgium. *Journal of Apicultural Research* **50**, 195-202, doi:10.3896/ibra.1.50.3.03 (2011).

117 33 Baker, A. & Schroeder, D. Occurrence and genetic analysis of picorna-like viruses infecting worker bees of *Apis mellifera* L. populations in Devon,  
118 South West England. *Journal of Invertebrate Pathology* **98**, 239-242, doi:10.1016/j.jip.2008.02.010 (2008).

119 34 Antunez, K. *et al.* Low prevalence of honeybee viruses in Spain during 2006 and 2007. *Research in Veterinary Science* **93**, 1441-1445,  
120 doi:10.1016/j.rvsc.2012.03.006 (2012).

121 35 Cornman, R. S. *et al.* Pathogen webs in collapsing honey bee colonies. *Plos One* **7**, doi:10.1371/journal.pone.0043562 (2012).

122 36 Cox-Foster, D. L. *et al.* A metagenomic survey of microbes in honey bee colony collapse disorder. *Science* **318**, 283-287,  
123 doi:10.1126/science.1146498 (2007).

124 37 Dainat, B., Evans, J. D., Chen, Y. P., Gauthier, L. & Neumann, P. Predictive Markers of Honey Bee Colony Collapse. *Plos One* **7**,  
125 doi:10.1371/journal.pone.0032151 (2012).

126 38 Budge, G. E. *et al.* Pathogens as Predictors of Honey Bee Colony Strength in England and Wales. *Plos One* **10**, doi:10.1371/journal.pone.0133228  
127 (2015).

128 39 Welch, A., Drummond, F., Tewari, S., Averill, A. & Burand, J. P. Presence and Prevalence of Viruses in Local and Migratory Honeybees (*Apis  
129 mellifera*) in Massachusetts. *Applied and Environmental Microbiology* **75**, 7862-7865, doi:10.1128/aem.01319-09 (2009).

130 40 Bacandritsos, N. *et al.* Sudden deaths and colony population decline in Greek honey bee colonies. *Journal of Invertebrate Pathology* **105**, 335-340,  
131 doi:10.1016/j.jip.2010.08.004 (2010).

132 41 Traynor, K. S. *et al.* Multiyear survey targeting disease incidence in US honey bees. *Apidologie* **47**, 325-347, doi:10.1007/s13592-016-0431-0 (2016).

133 42 Tozkar, C., Kence, M., Kence, A., Huang, Q. & Evans, J. Metatranscriptomic analyses of honey bee colonies. *Frontiers in genetics* **6**, 100 (2015).

134 43 Ravoet, J. *et al.* Comprehensive bee pathogen screening in Belgium reveals *Crithidia mellificae* as a new contributory factor to winter mortality. *Plos  
135 One* **8**, doi:10.1371/journal.pone.0072443 (2013).



136 44 Amiri, E., Meixner, M., Nielsen, S. L. & Kryger, P. Four Categories of Viral Infection Describe the Health Status of Honey Bee Colonies. *Plos One* **10**,  
137 doi:10.1371/journal.pone.0140272 (2015).  
138 45 Gajger, I. T., Kolodziejek, J., Bakonyi, T. & Nowotny, N. Prevalence and distribution patterns of seven different honeybee viruses in diseased  
139 colonies: a case study from Croatia. *Apidologie* **45**, 701-706, doi:10.1007/s13592-014-0287-0 (2014).  
140 46 Granberg, F. *et al.* Metagenomic Detection of Viral Pathogens in Spanish Honeybees: Co- Infection by Aphid Lethal Paralysis, Israel Acute Paralysis  
141 and Lake Sinai Viruses. *Plos One* **8**, doi:10.1371/journal.pone.0057459 (2013).  
142 47 Nielsen, S. L., Nicolaisen, M. & Kryger, P. Incidence of acute bee paralysis virus, black queen cell virus, chronic bee paralysis virus, deformed wing  
143 virus, Kashmir bee virus and sacbrood virus in honey bees (*Apis mellifera*) in Denmark. *Apidologie* **39**, 310-314, doi:10.1051/apido:2008007 (2008).  
144
